# Supplementary material for: Cyclodextrin-Based Nanostructure Efficiently Delivers siRNA to Glioblastoma Cells Preferentially via Macropinocytosis
Source: Int J Mol Sci. 2020 Dec 6;21(23):9306. doi: 10.3390/ijms21239306 (PMC7731237; doi:10.3390/ijms21239306)
Supplement: Supplementary file 1 [file ijms-21-09306-s001.pdf]

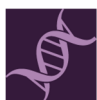

## Supporting Information

**Figure S1.** AMC6/Alexa 488 Fluor siRNA complexes uptake time course.

### C6 cells.

2h

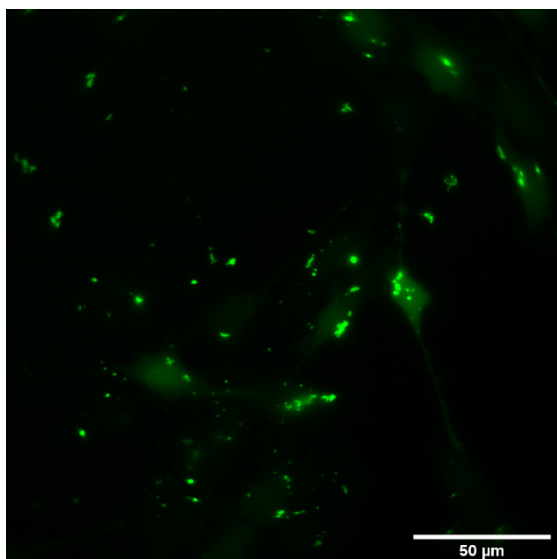

4h

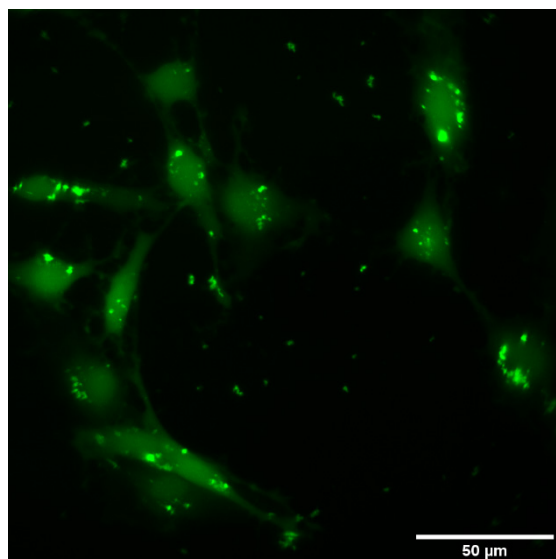

6h

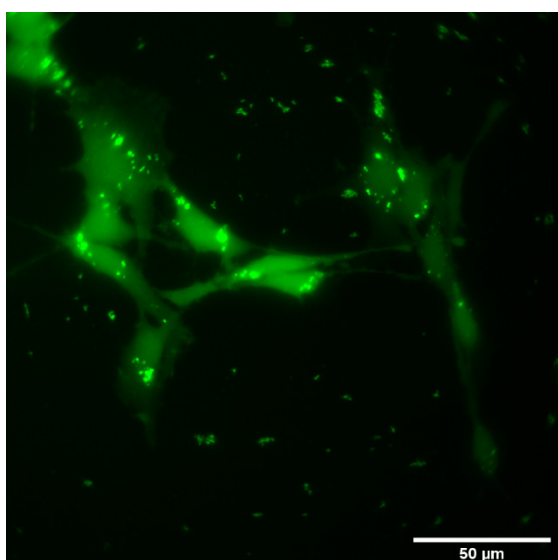

8h

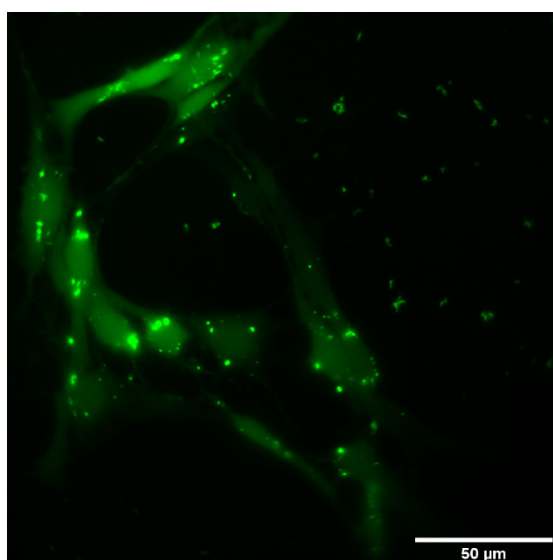

10h

12h

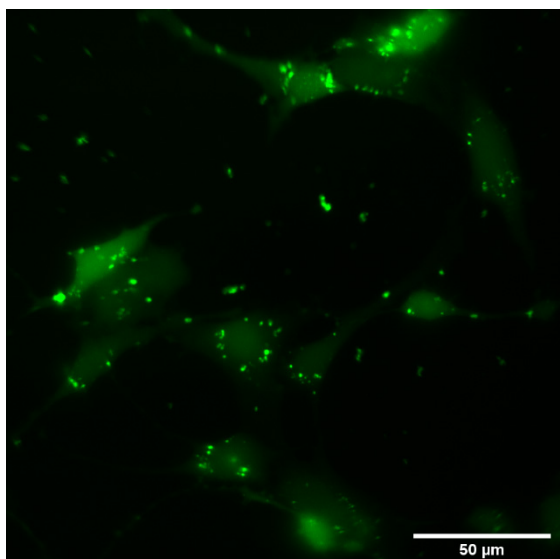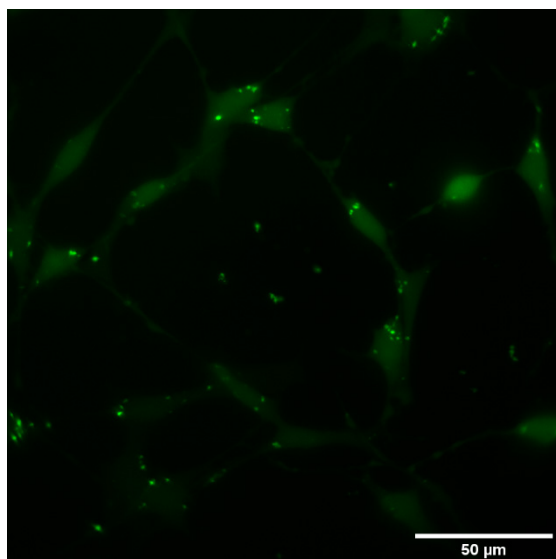

24h

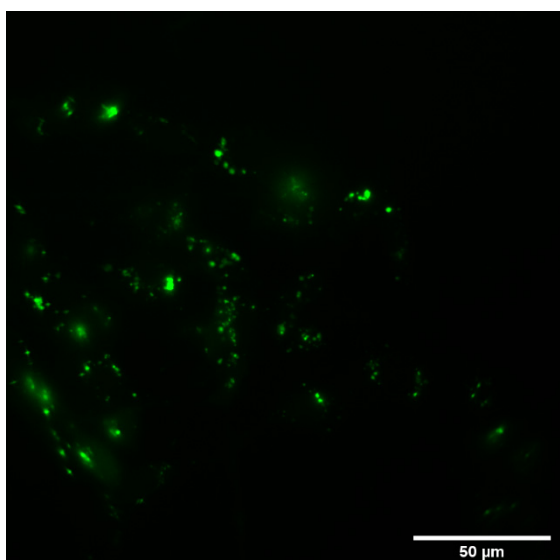

## U87 cells

2h

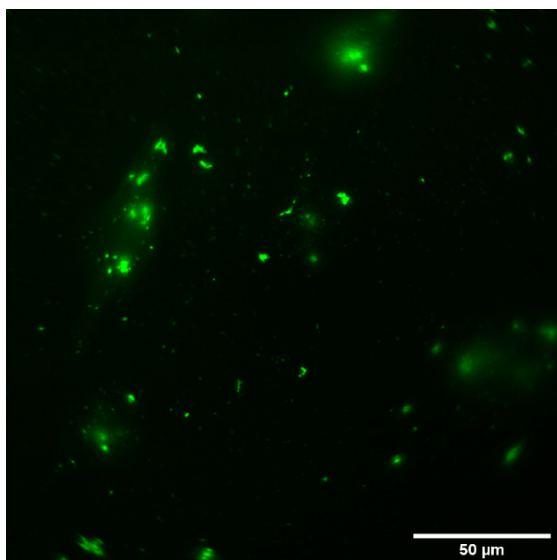

4h

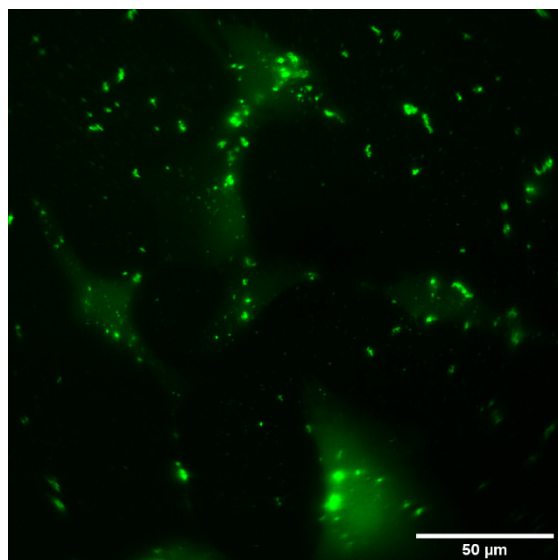

6h

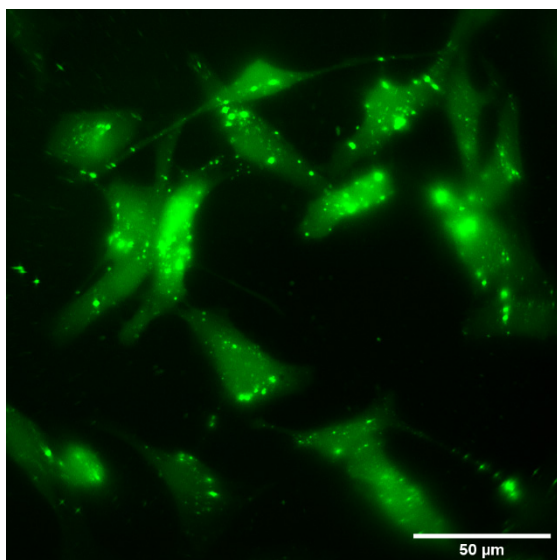

8h

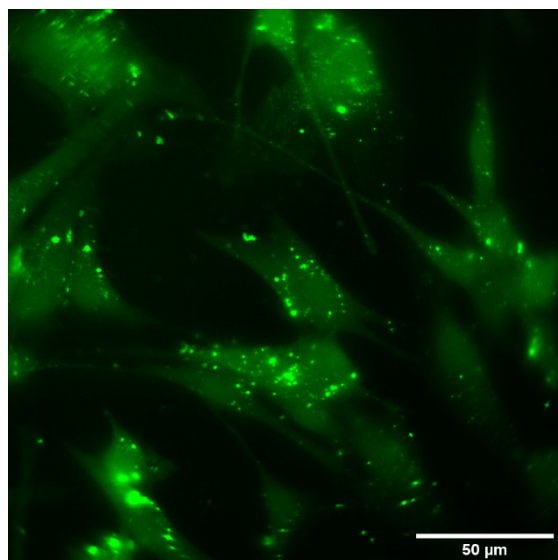

10h

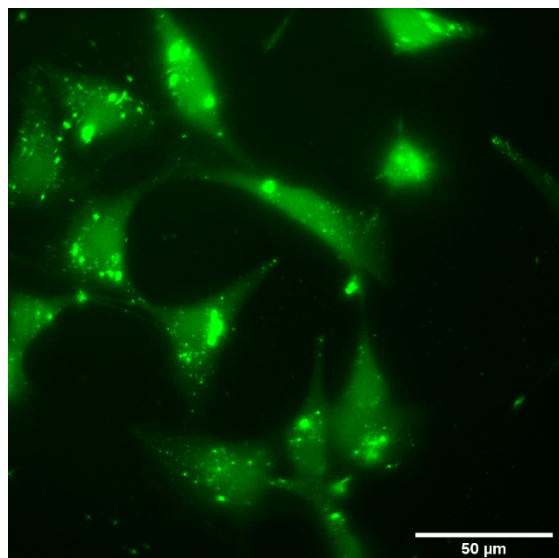

12h

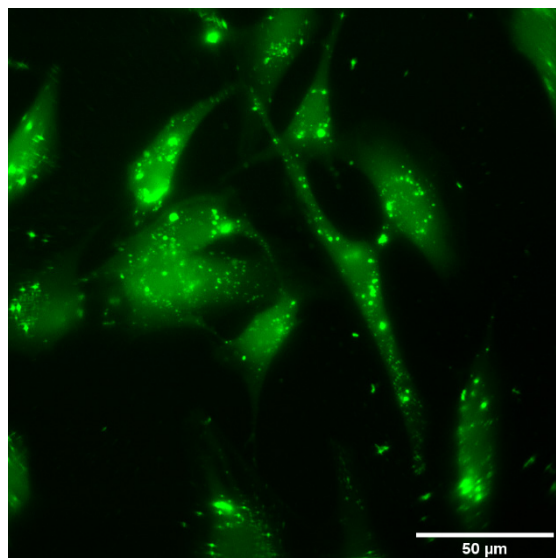

24h

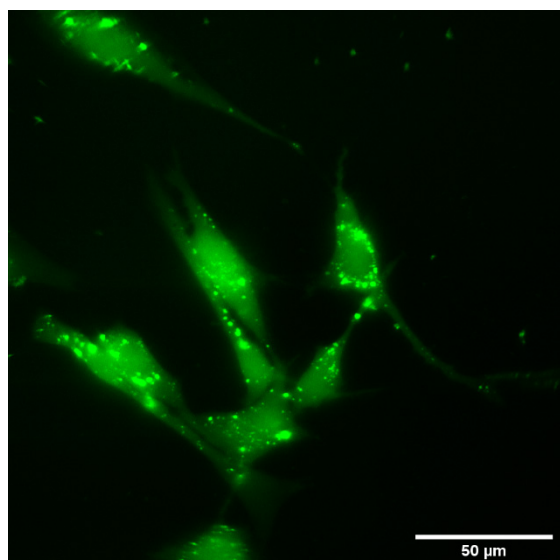

## GL-261 cells

2h

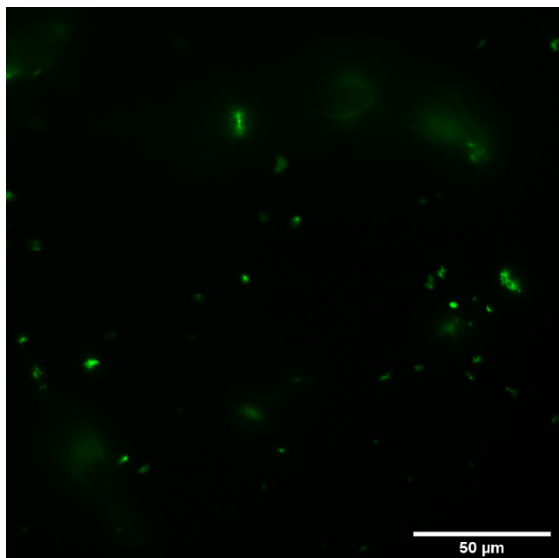

4h

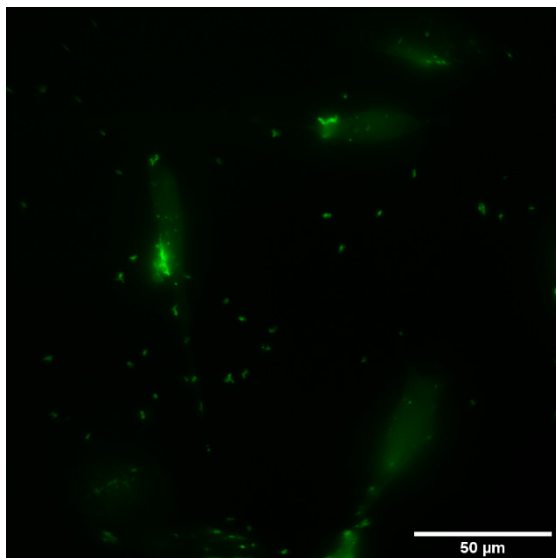

6h

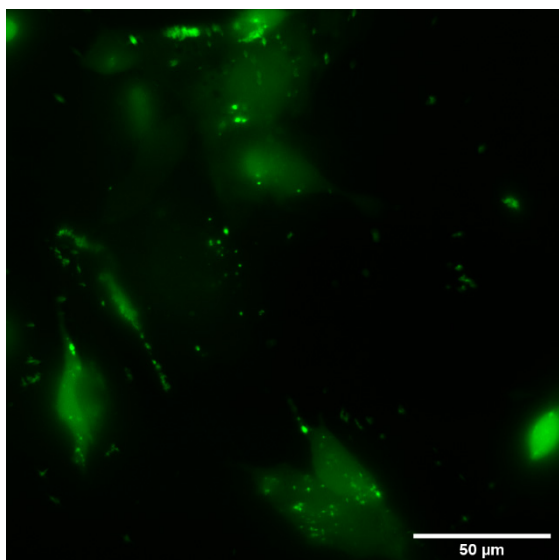

8h

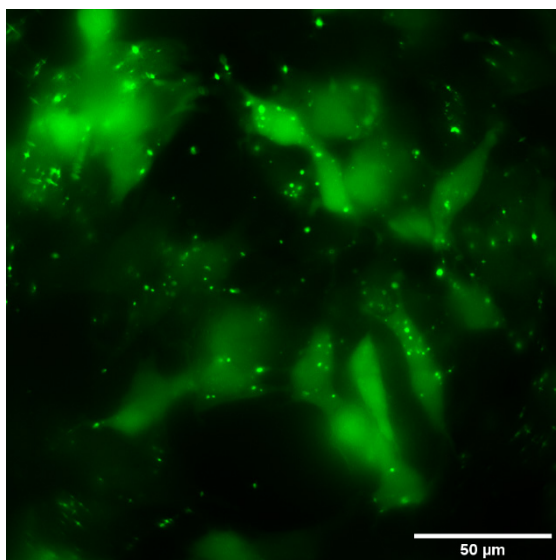

10h

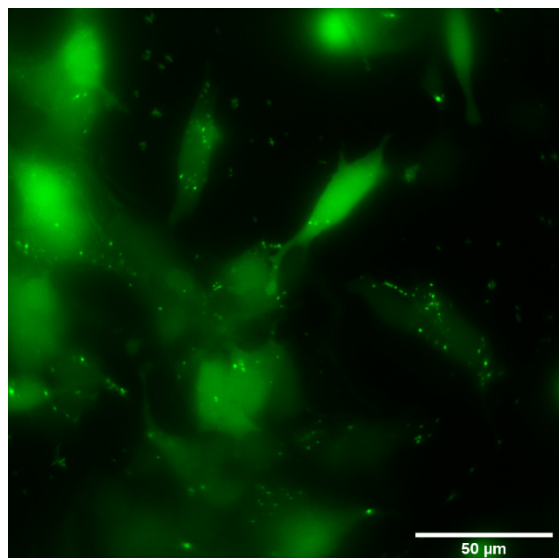

12h

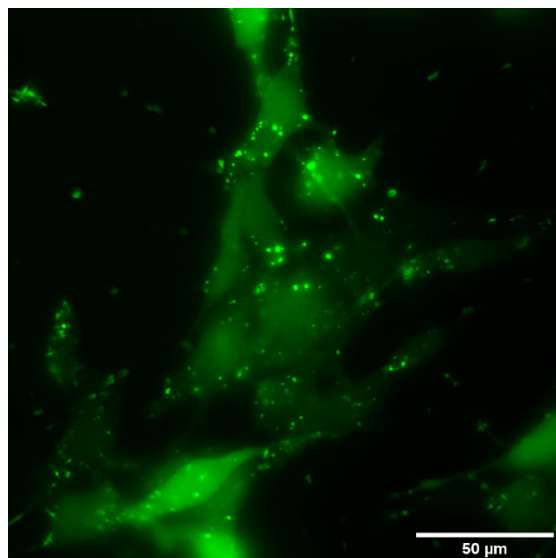

24h

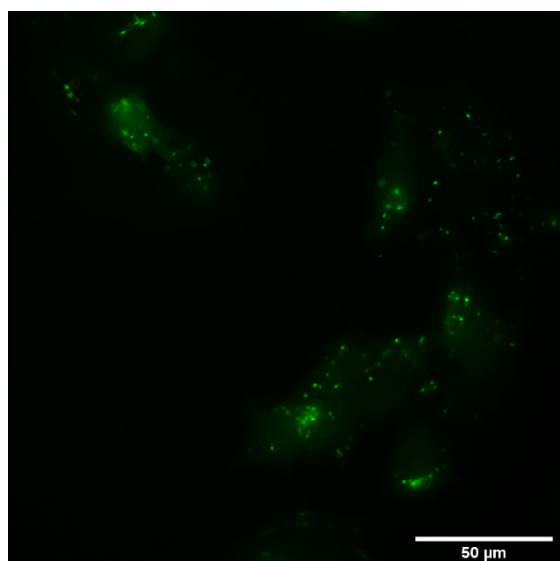

## T98G cells

2h

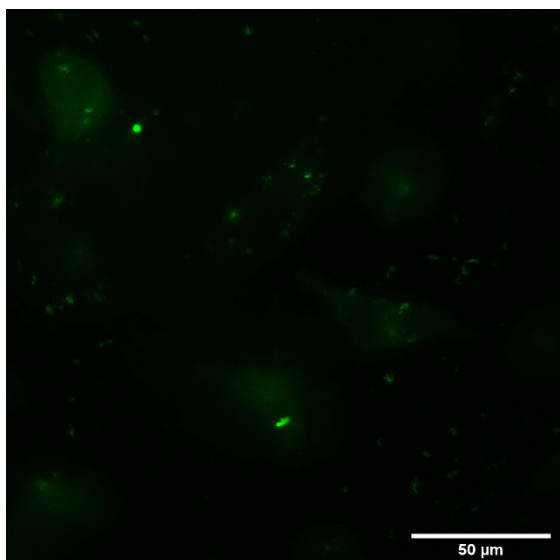

4h

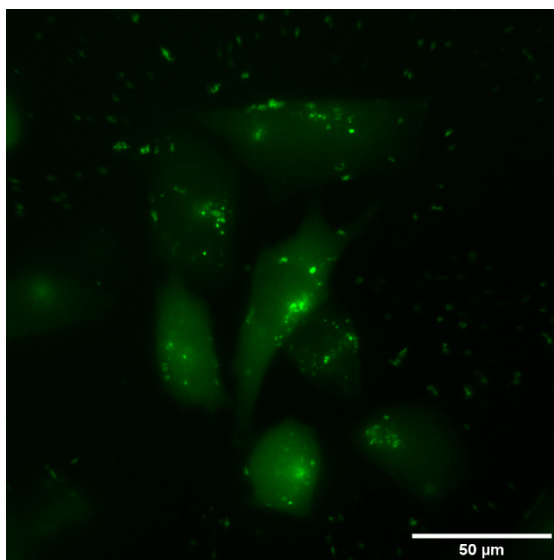

6h

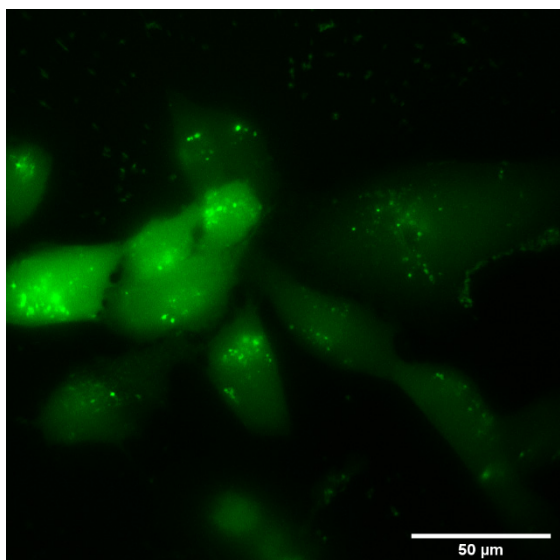

8h

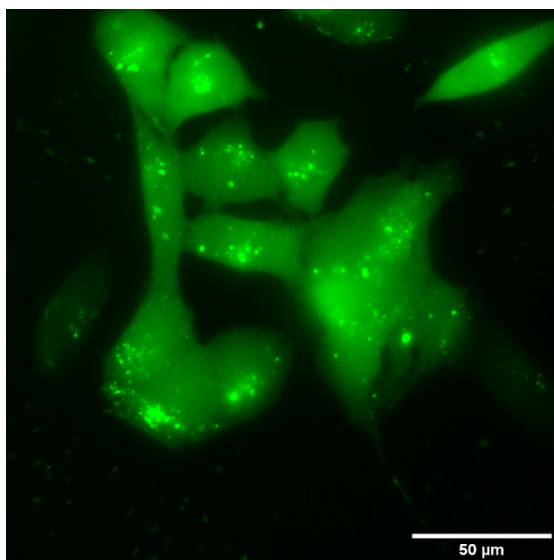

10h

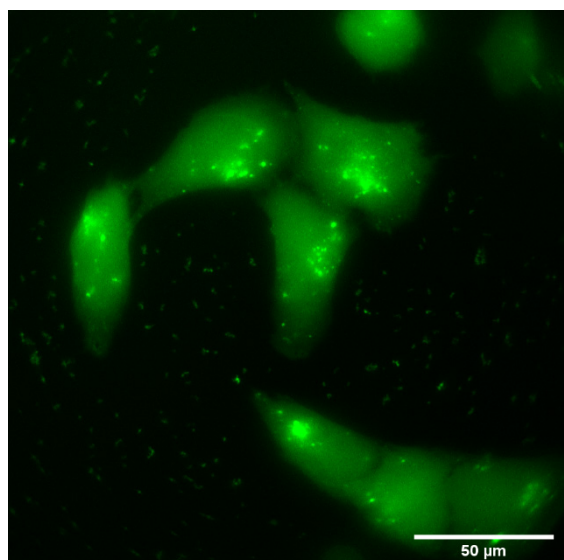

12h

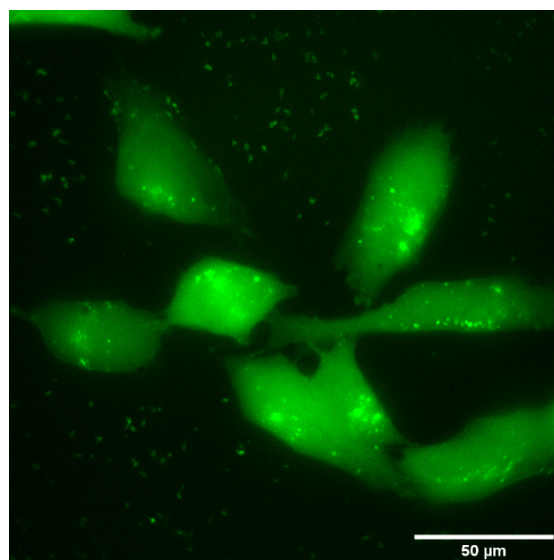

24h

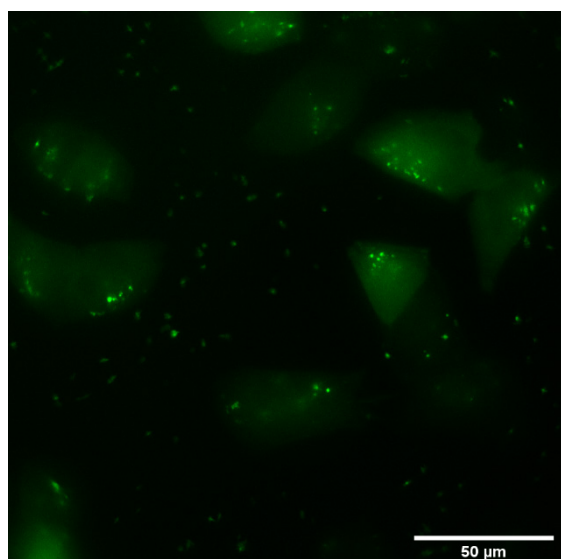

**Figure S2.** Effect of CLTC, CAV1 or PAK1 knock-down on the other endocytosis proteins. Specific down-regulation (with AMC6 complexed to the corresponding siRNA at 50 nM) of any of the key endocytosis proteins studied does not affect cellular levels of the non-targeted proteins.  $\alpha$ -Tubulin was used as loading control for CLTC, while GAPDH was used in the case of CAV1 and PAK1. A. CLTC knock-down. B. CAV1 knock-down. C. PAK1 knock-down.

A.

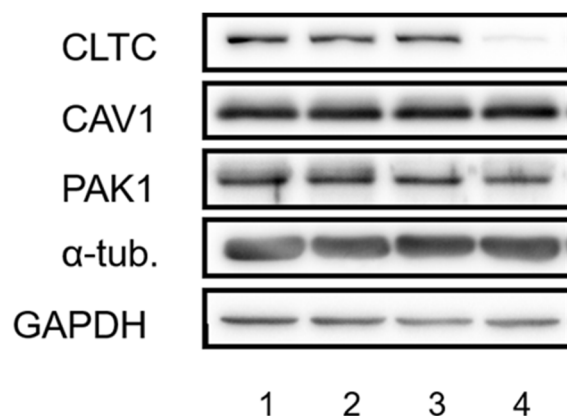

B.

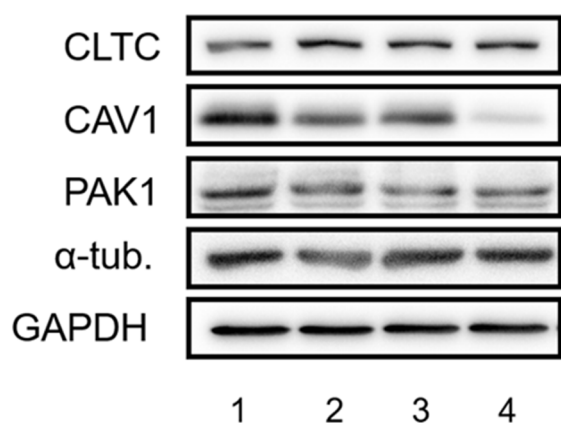

C.

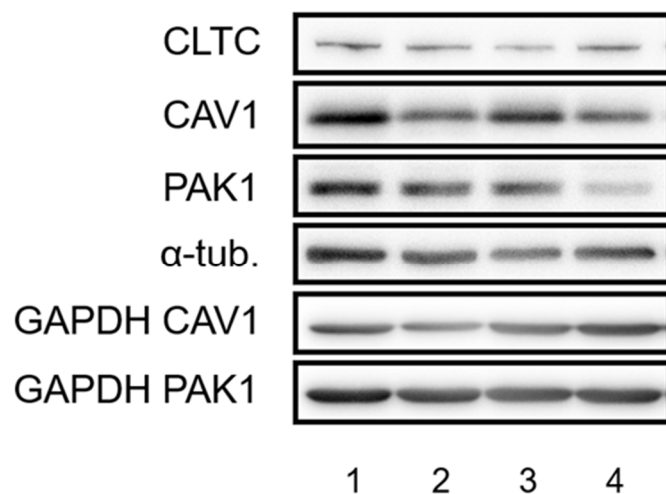

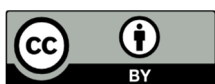

© 2020 by the authors. Licensee MDPI, Basel, Switzerland. This article is an open access article distributed under the terms and conditions of the Creative Commons Attribution (CC BY) license (<http://creativecommons.org/licenses/by/4.0/>).
